# Supplementary material for: Serum and CSF neurofilament light chain and glial fibrillary acidic protein levels in idiopathic intracranial hypertension
Source: Research Square preprint supplement (doi:10.21203/rs.3.rs-8758994/v1), 2026-02-05
Supplement: Supplementary file 1 [file 08d2bd203840570ceef62ca7.docx]

**Suppl. Table 1.** Routine CSF parameters in pwIIH based on papilledema degree. CSF: cerebrospinal fluid, OCB: oligoclonal bands, pwIIH: people with idiopathic intracranial hypertension, Qalbumin: albumin quotient, QIgA: IgA quotient, QIgG: IgG quotient, QIgM: IgM quotient, WBC: white blood cell.

|  | **Mild papilledema (n=21)** | **Moderate to severe papilledema (n=9)** | **p-value** |
| --- | --- | --- | --- |
| WBC count (/µl)b | 3 (2, 4) | 2 (1, 2) | 0.115 |
| Total protein level (mg/dl)b | 26.2 (20.5, 31.5) | 24.5 (23.6, 30.9) | 0.618 |
| Serum IgG level (mg/dl)a | 1062 (184) | 1149 (243) | 0.357 |
| CSF IgG level (mg/dl)b | 1.93 (1.19, 2.69) | 1.88 (1.38, 2.13) | >0.999 |
| QIgGb | 1.68 (1.26, 2.33) | 1.83 (1.53, 2.10) | 0.824 |
| IgG indexb | 0.46 (0.41, 0.50) | 0.47 (0.42, 0.51) | 0.790 |
| Serum IgA level (mg/dl)b | 198 (141, 243) | 162 (136, 268) | 0.946 |
| CSF IgA level (mg/dl)b | 0.19 (0.10, 0.27) | 0.17 (0.08, 0.28) | >0.999 |
| QIgAb | 0.92 (0.71, 1.25) | 0.87 (0.82, 1.27) | 0.700 |
| IgA indexb | 0.24 (0.22, 0.26) | 0.25 (0.22, 0.29) | 0.563 |
| Serum IgM level (mg/dl)b | 79 (64, 127) | 91 (69, 92) | 0.803 |
| CSF IgM level (mg/dl)b | 0.01 (0.01, 0.04) | 0.02 (0.01, 0.04) | 0.370 |
| QIgMb | 0.19 (0.14, 0.24) | 0.29 (0.22, 0.37) | 0.094 |
| IgM indexb | 0.05 (0.04, 0.07) | 0.09 (0.07, 0.11) | 0.070 |
| Qalbumina | 3.98 (1.43) | 4.24 (1.82) | 0.707 |
| OCBc | 1 (4.8) | 0 (0) | >0.999 |

**Suppl. Table 2.** Univariate correlations between CSF and serum NfL and GFAP levels and ophthalmological outcomes at all time points.

|  | **Baseline (M0)** | | | **M3** | | | **M6** | | | **M12** | | |
| --- | --- | --- | --- | --- | --- | --- | --- | --- | --- | --- | --- | --- |
|  | **pRNFL** | **GCL** | **AONSD** | **pRNFL** | **GCL** | **AONSD** | **pRNFL** | **GCL** | **AONSD** | **pRNFL** | **GCL** | **AONSD** |
| CSF NfL | -0.11 | 0.06 | 0.25* | 0.05 | 0.13 | 0.24* | -0.01 | 0.09 | 0.43* | -0.19* | 0.05 | 0.30* |
| sNfL | -0.24 | 0.04 | -0.12 | -0.16 | 0.04 | 0.05 | -0.23 | -0.08 | 0.03 | -0.31 | -0.02 | -0.04 |
| sNfL z-score | -0.17 | 0.13 | -0.02* | -0.17 | 0.18 | -0.18* | -0.23 | 0.05 | -0.08* | -0.17* | 0.15 | 0.03* |
| QNfL | 0.17 | 0.07 | 0.32 | 0.23 | 0.07 | 0.16 | 0.22 | 0.18 | 0.20 | 0.31 | 0.01 | 0.14 |
| NfL index | 0.16 | 0.22 | 0.25 | 0.18 | 0.27 | 0.26 | 0.22 | 0.35 | 0.16 | 0.33 | 0.27 | 0.37 |
| CSF GFAP | -0.18 | -0.10 | 0.04* | -0.02 | 0.03 | 0.28* | 0.12 | 0.04 | -0.26* | -0.02* | -0.12 | -0.06* |
| sGFAP | -0.10 | -0.14 | -0.22 | -0.05 | -0.13 | -0.17 | -0.12 | -0.16 | 0.07 | -0.17 | -0.18 | -0.11 |
| sGFAP z-score | -0.05 | -0.13 | -0.20* | -0.04 | -0.12 | -0.26* | -0.12 | -0.15 | -0.22* | -0.11 | -0.20 | -0.14* |
| QGFAP | 0.04 | 0.09 | 0.21 | 0.15 | 0.08 | 0.39 | 0.22 | 0.12 | -0.08 | 0.21 | 0.03 | 0.14 |
| GFAP index | 0.05 | 0.08 | 0.25 | 0.08 | 0.15 | 0.41 | 0.18 | 0.21 | -0.01 | 0.21 | 0.10 | 0.13 |

AONSD: arachnoid optic nerve sheath diameter, CSF: cerebrospinal fluid, GCL: ganglion cell layer, GFAP: glial fibrillary acidic protein, NfL: neurofilament light chain, pRNFL: peripapillary retinal nerve fiber layer, QGFAP: GFAP quotient, QNfL: NfL quotient, sGFAP: serum GFAP, sNfL: serum NfL.

**Pearson correlation coefficient*

**Suppl. Table 3.** Linear regression models and mixed-effects models for CSF and serum NfL and GFAP levels and ophthalmological outcomes, adjusted for age, BMI and CSF OP.

|  | **Linear regression model (baseline)**  **β (95% CI)** | | | **Mixed-effects model (repeated measures)**  **β (95% CI)** | | |
| --- | --- | --- | --- | --- | --- | --- |
|  | **pRNFL** | **GCL** | **AONSD** | **pRNFL** | **GCL** | **AONSD** |
| CSF NfL | 0.35 (-1.38, 2.07) | 17.27 (-901.41, 936-96) | 145.20 (-80.70, 371.09) | 1.49 (-11.75, 14.72) | 465.44 (-486.13, 1417.02) | 191.03 (-255.80, 637.85) |
| sNfL | 0.00 (-0.05, 0.06) | 5.68 (-26.66, 38.03) | -2.15 (-8.98, 4.68) | 0.01 (-0.36, 0.38) | 1.66 (-25.61, 28.94) | -4.39 (-15.48, 6.70) |
| sNfL z-score | 0.00 (-0.01, 0.01) | 0.96 (-2.95, 4.86) | 0.15 (-0.71, 1.00) | 0.01 (-0.04, 0.07) | 1.20 (-2.70, 5.10) | -0.04 (-1.80, 1.73) |
| QNfL | -0.15 (-0.43, 0.13) | -57.20 (-230.30, 115.90) | 22.95 (-14.21, 60.11) | -0.50 (-3.21, 2.21) | -21.76 (-222.46, 178.94) | 26.98 (-52.18, 106.14) |
| NfL index | 0.00 (-0.09, 0.10) | 12.35 (-46.04, 70.73) | 3.48 (-9.50, 16.47) | 0.20 (-0.74, 1.15) | 31.28 (-37.09, 99.65) | 19.78 (-10.85, 50.41) |
| CSF GFAP | -25.87 (-46.36, -5.39)* | -895.32 (-15250.49, 13459.86) | -82.60 (-3189.60, 3024.42) | -14.20 (-215.11, 186.70) | 3.05 (-14848.91, 14855.00) | 2031.79 (-4189.84, 8255.42) |
| sGFAP | -0.07 (-0.86, 0.71) | 88.80 (-394.17, 571.78) | -42.26 (-144.81, 60.29) | -0.78 (-6.28, 4.72) | -56.57 (-463.18, 350.04) | -47.39 (-213.40, 118.62) |
| sGFAP z-score | 0.00 (-0.01, 0.01) | 0.86 (-5.06, 6.77) | -0.46 (-1.70, 0.79) | 0.00 (-0.09, 0.09) | -0.60 (-7.21, 6.00) | -0.26 (-2.96, 2.44) |
| QGFAP | -0.66 (-1.16, -0.16)* | -26.14 (-382.46, 330.18) | 31.52 (-44.01, 107.06) | -0.97 (-6.45, 4.51) | 25.44 (-380.93, 431.81) | 61.62 (-109.22, 232.46) |
| GFAP index | -0.19 (-0.45, 0.06) | 44.72 (-122.63, 212.07) | 0.48 (-35.84, 36.80) | 0.46 (-2.37, 3.30) | 28.71 (-127.56, 284.97) | 54.62 (-39.33, 148.57) |

AONSD: arachnoid optic nerve sheath diameter, BMI: body mass index, CSF: cerebrospinal fluid, GCL: ganglion cell layer, GFAP: glial fibrillary acidic protein, NfL: neurofilament light chain, OP: opening pressure, pRNFL: peripapillary retinal nerve fiber layer, QGFAP: GFAP quotient, QNfL: NfL quotient, sGFAP: serum GFAP, sNfL: serum NfL.

**p<0.05 (uncorrected); not significant after adjustment for multiple comparisons*
